# Supplementary material for: Peptide-siRNA nanocomplexes targeting NF-κB subunit p65 suppress nascent experimental arthritis
Source: JCI journal article supplement (doi:10.1172/jci75673), 2014-08-25
Supplement: sd1 [file 1]

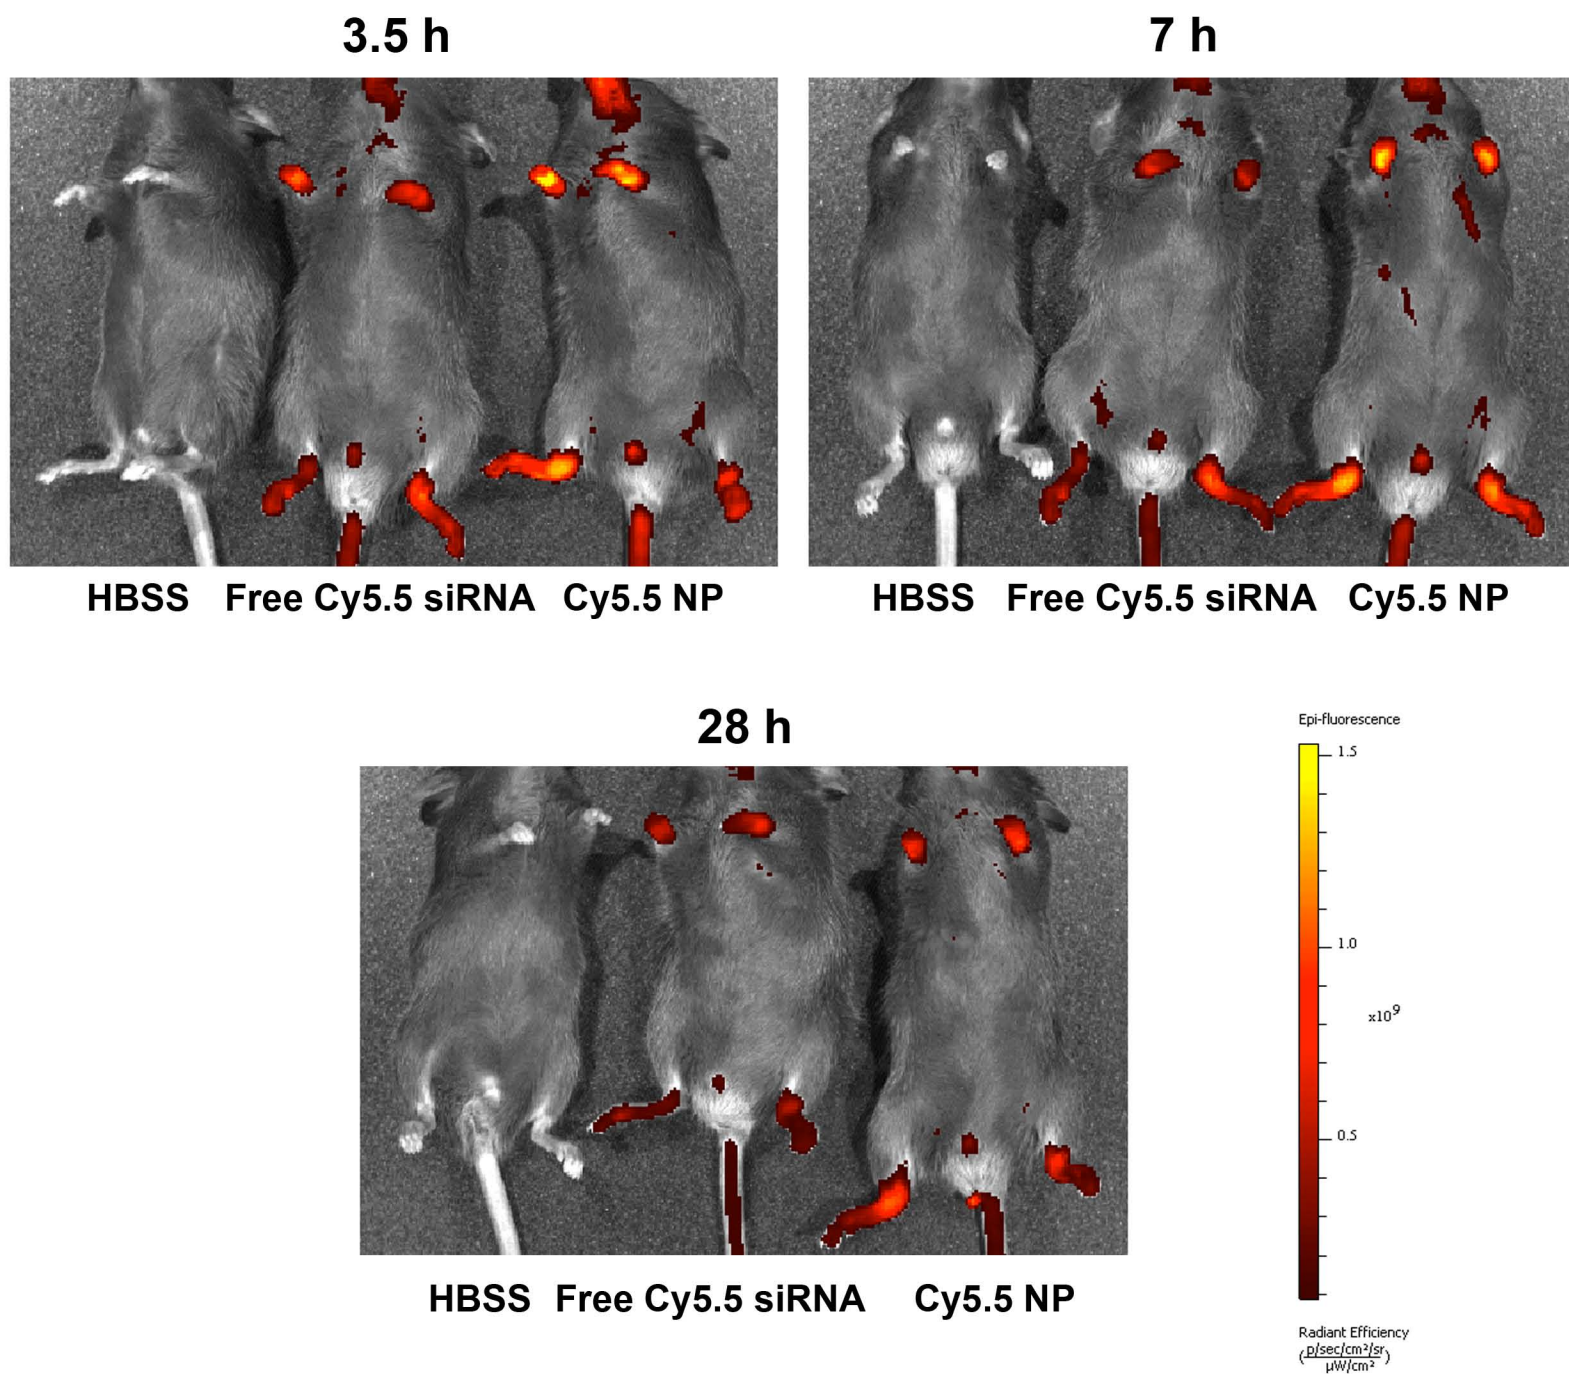

### Figure S1. siRNA accumulation in inflamed paws

Day 4 arthritic mice received i.v. injection of HBSS, free Cy5.5-labeled scrambled siRNA (free Cy5.5 siRNA), or p5RHH-Cy5.5-labeled scrambled siRNA nanoparticles (Cy5.5 NP) and in vivo fluorescent images were acquired at 3.5 h, 7h, and 28 h post injection.

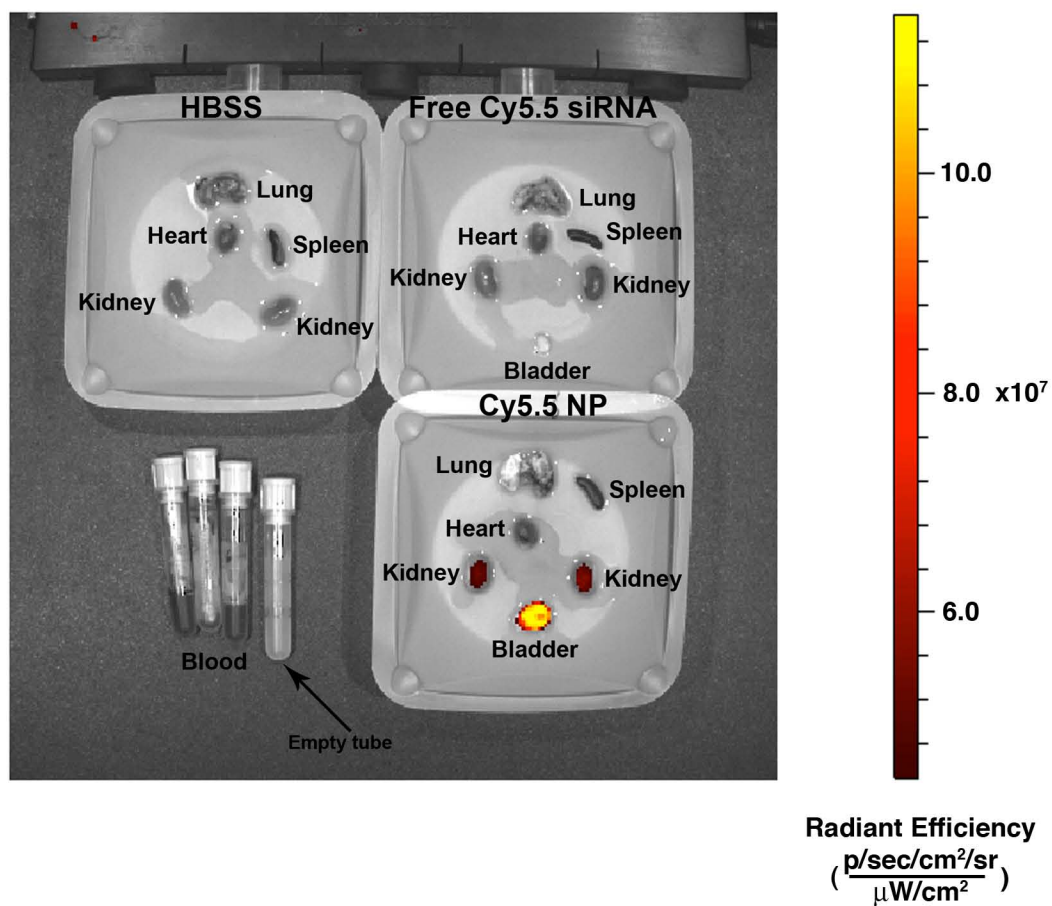

**Figure S2. In vivo stability of p5RHH-siRNA nanoparticles**

Mice were injected with HBSS, free Cy5.5-labeled scrambled siRNA (free Cy5.5 siRNA), or Cy5.5 NP. Organs and blood were collected 24 h after injection for fluorescence imaging.

## Peripheral blood leukocytes

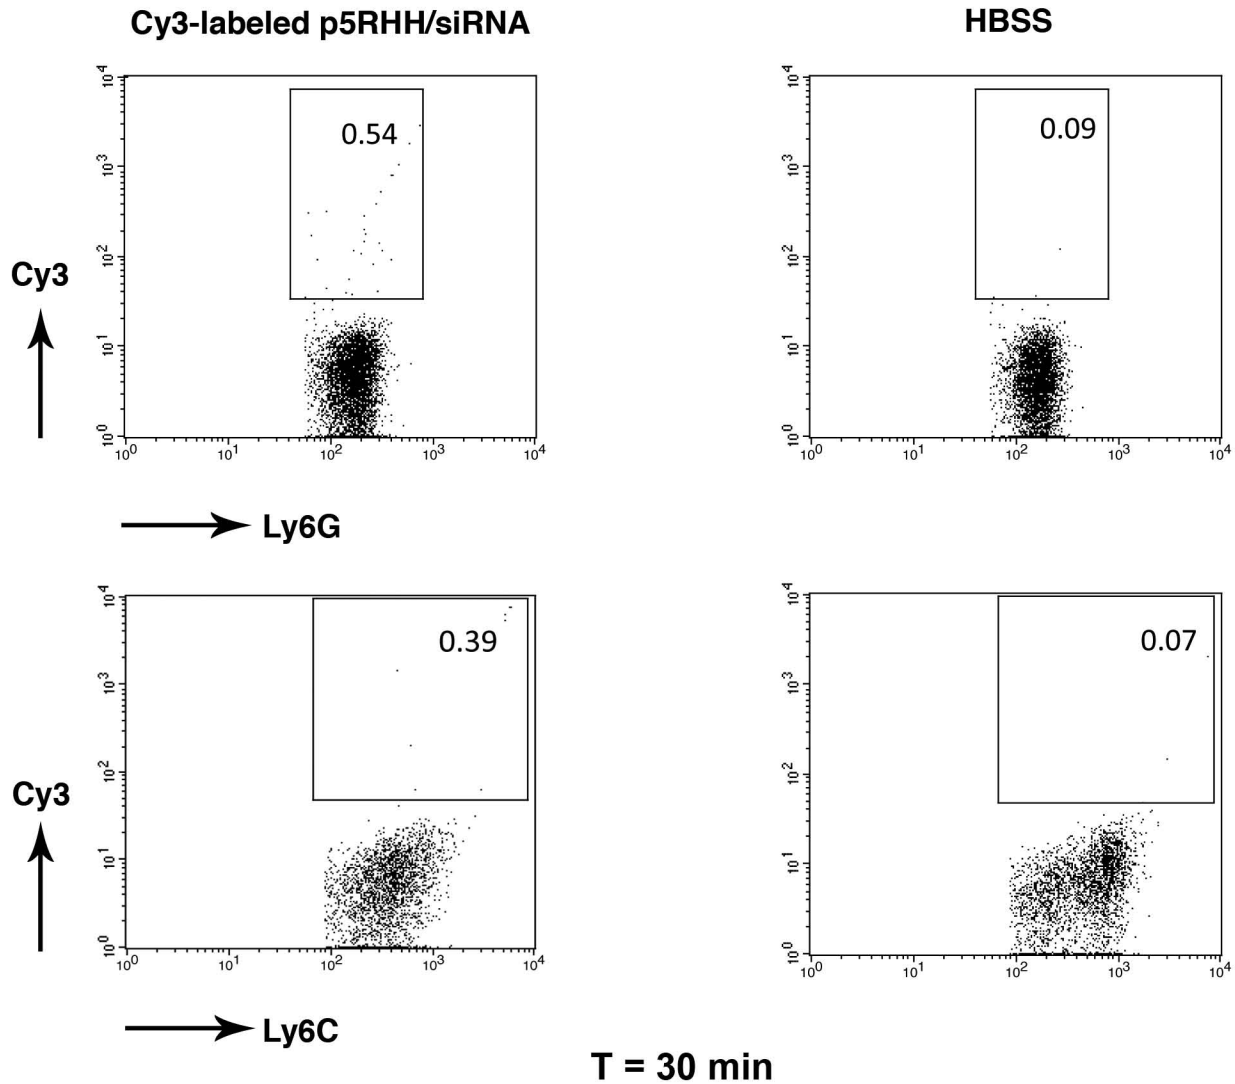

**Figure S3. Minimal uptake of p5RHH/siRNA nanoparticles by circulating phagocytes**

Mice were injected with HBSS or nanoparticles containing Cy3-labeled scrambled siRNA sequence. After 30 min mice were sacrificed and peripheral blood white cells were obtained and analyzed for cell-associated nanoparticles (Cy3<sup>+</sup> cells) by flow cytometry. Cells were co-stained with Ly6G (neutrophils) or Ly6C (monocytes). Percentage of double-positive cells (Cy3<sup>+</sup>/Ly6G<sup>+</sup> or Cy3<sup>+</sup>/Ly6C<sup>+</sup>) is indicated in boxed areas.

## Splenocytes

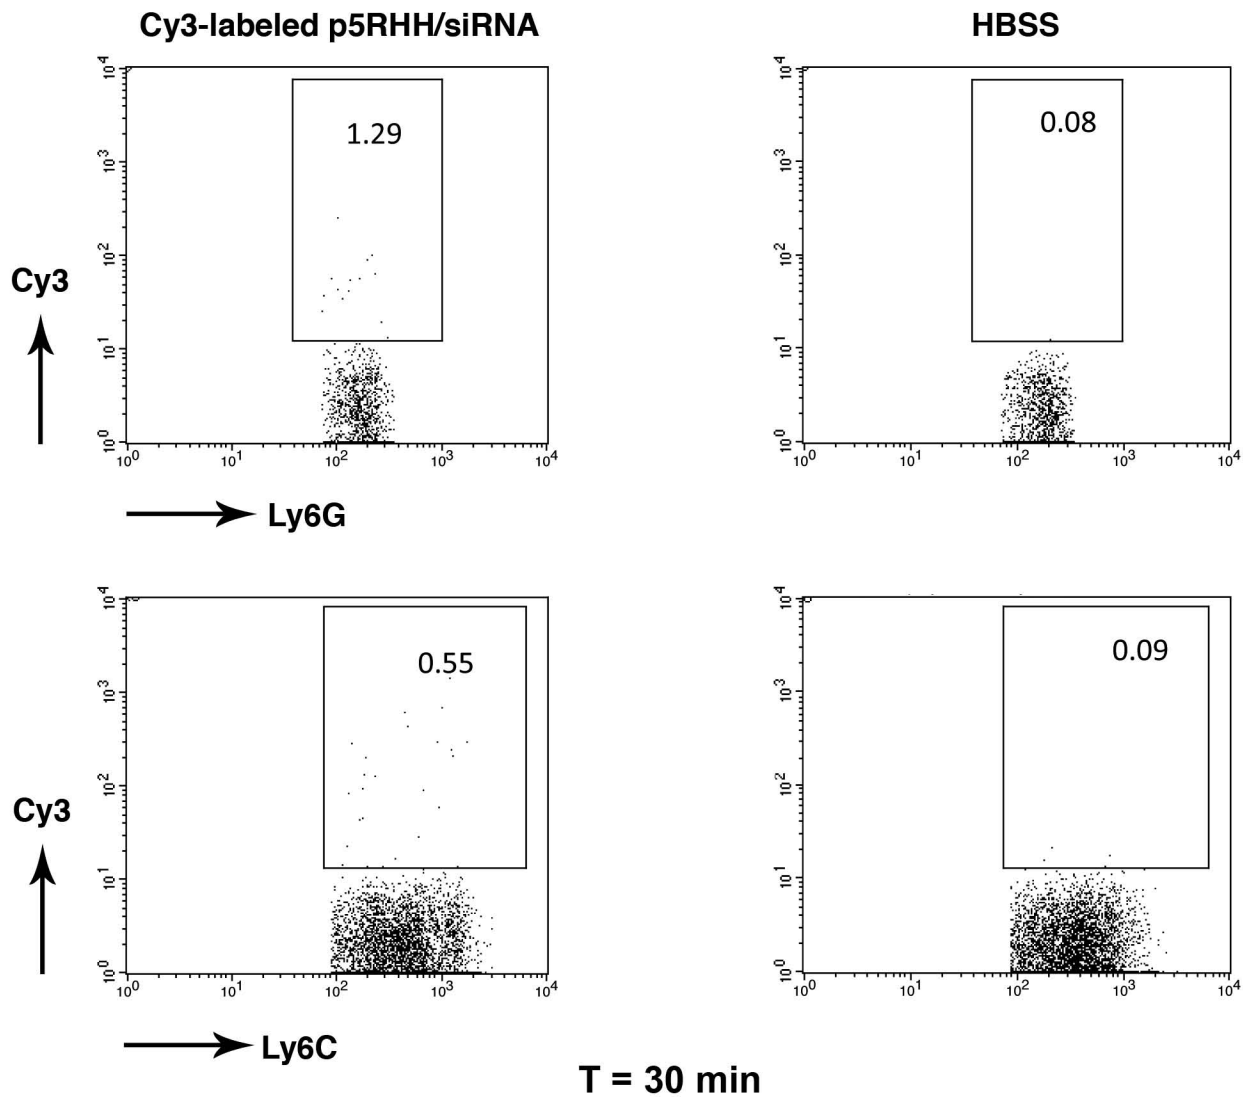

**Figure S4. Minimal uptake of p5RHH/siRNA nanoparticles by splenocytes**

Mice were injected with HBSS or nanoparticles containing Cy3-labeled scrambled siRNA sequence. After 30 min mice were sacrificed and splenocytes were obtained and analyzed for cell-associated nanoparticles (Cy3<sup>+</sup> cells) by flow cytometry. Cells were co-stained with Ly6G (neutrophils) and Ly6C (monocytes). Percentage of double-positive cells (Cy3<sup>+</sup>/Ly6G<sup>+</sup> or Cy3<sup>+</sup>/Ly6C<sup>+</sup>) is indicated in boxed areas.

## Peripheral blood leukocytes

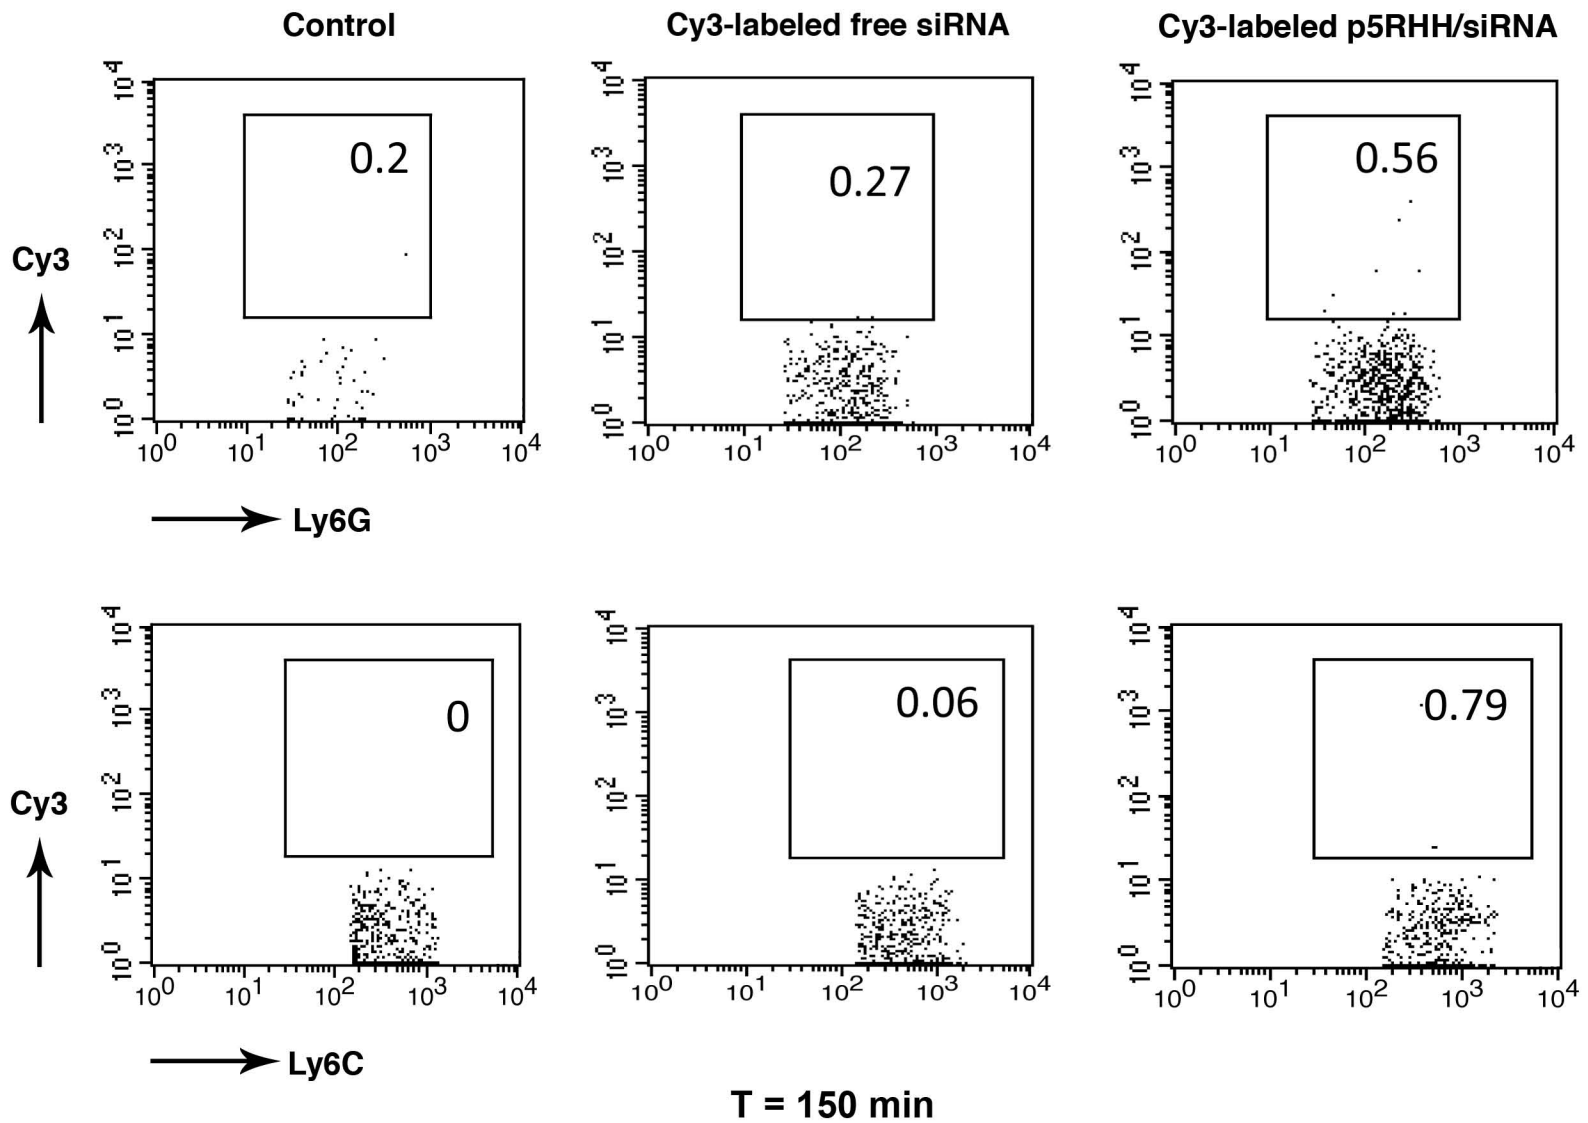

### Figure S5. Minimal uptake of p5RHH/siRNA nanoparticles by circulating phagocytes

Mice were injected with nanoparticles containing Cy3-labeled p65 siRNA or free Cy3-labeled p65 siRNA. After 150 min mice were sacrificed and peripheral blood white cells were obtained and analyzed for cell-associated nanoparticles (Cy3<sup>+</sup> cells) by flow cytometry. Cells were co-stained with Ly6G (neutrophils) or Ly6C (monocytes). Percentage of double-positive cells (Cy3<sup>+</sup>/Ly6G<sup>+</sup> or Cy3<sup>+</sup>/Ly6C<sup>+</sup>) is indicated in boxed areas. Uninjected mouse served as baseline control.

## Splenocytes

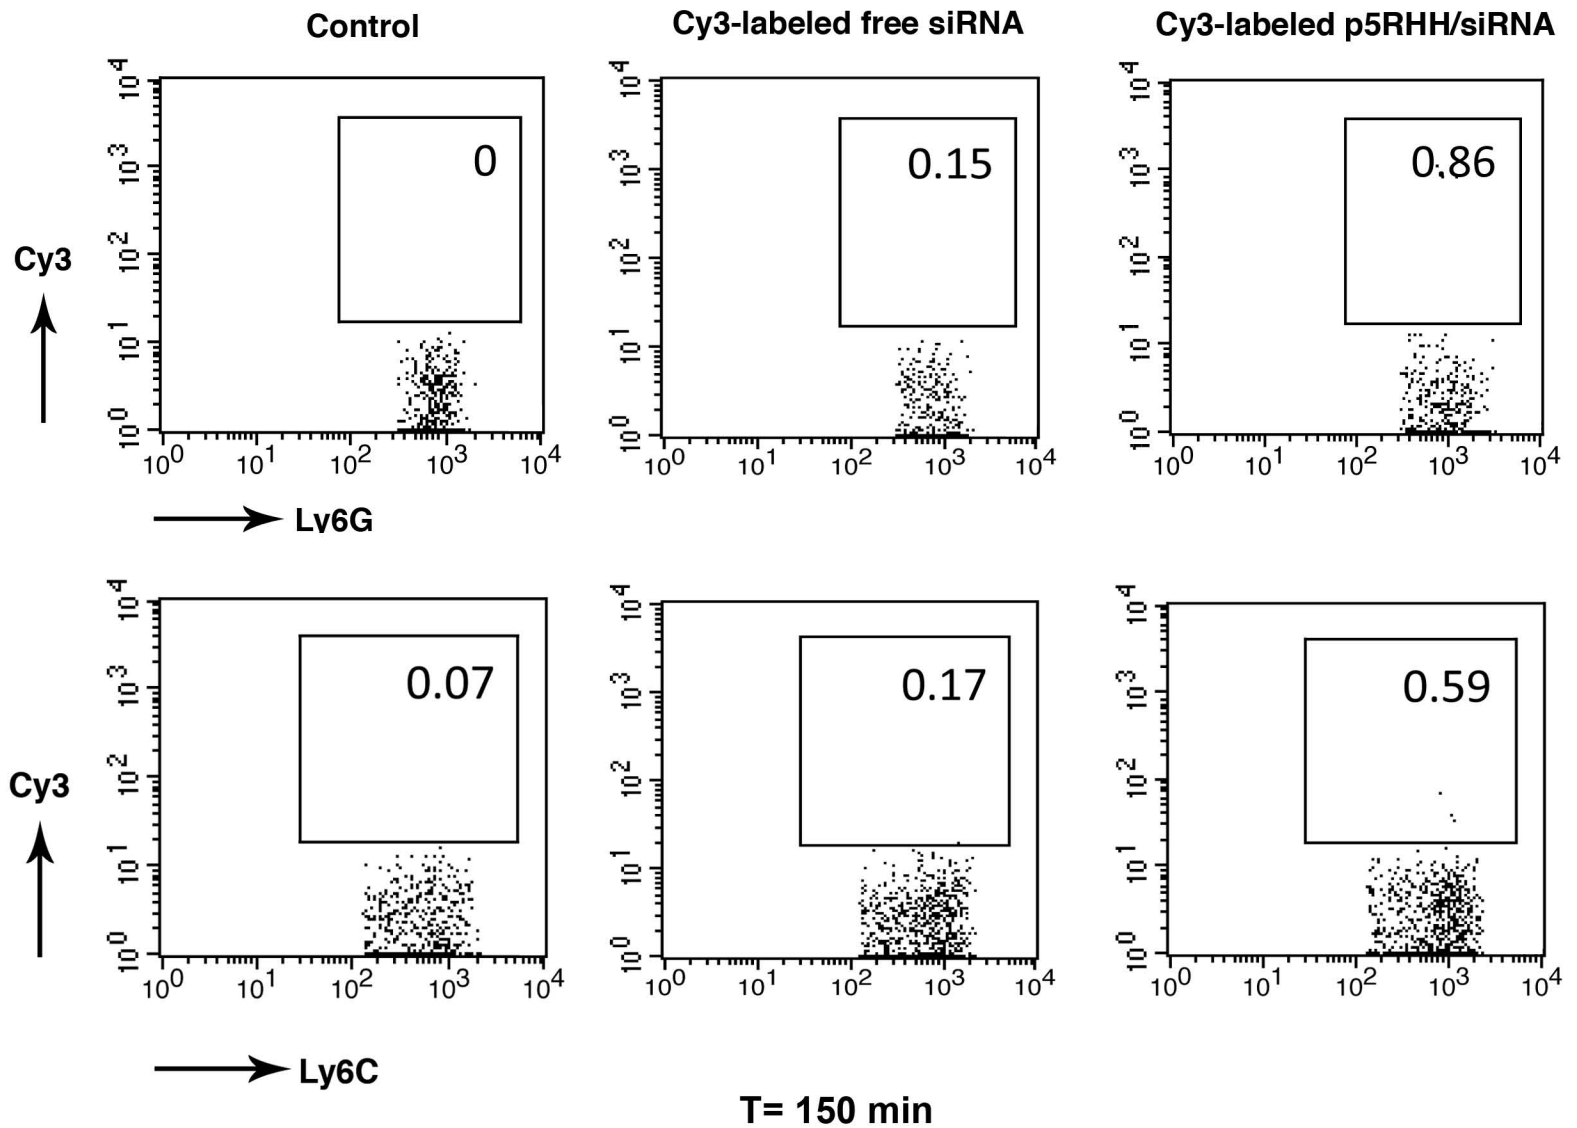

**Figure S6. Minimal uptake of p5RHH/siRNA nanoparticles by splenocytes**

Mice were injected with nanoparticles containing Cy3-labeled p65 siRNA. After 150 min mice were sacrificed and splenocytes were obtained and analyzed for cell-associated nanoparticles (Cy3<sup>+</sup> cells) by flow cytometry. Cells were co-stained with Ly6G (neutrophils) and Ly6C (monocytes). Percentage of double-positive cells (Cy3<sup>+</sup>/Ly6G<sup>+</sup> or Cy3<sup>+</sup>/Ly6C<sup>+</sup>) is indicated in boxed areas. TCRβ<sup>+</sup> (T) and CD19<sup>+</sup> (B) cells had no Cy3-associated signal. Uninjected mouse served as baseline control.



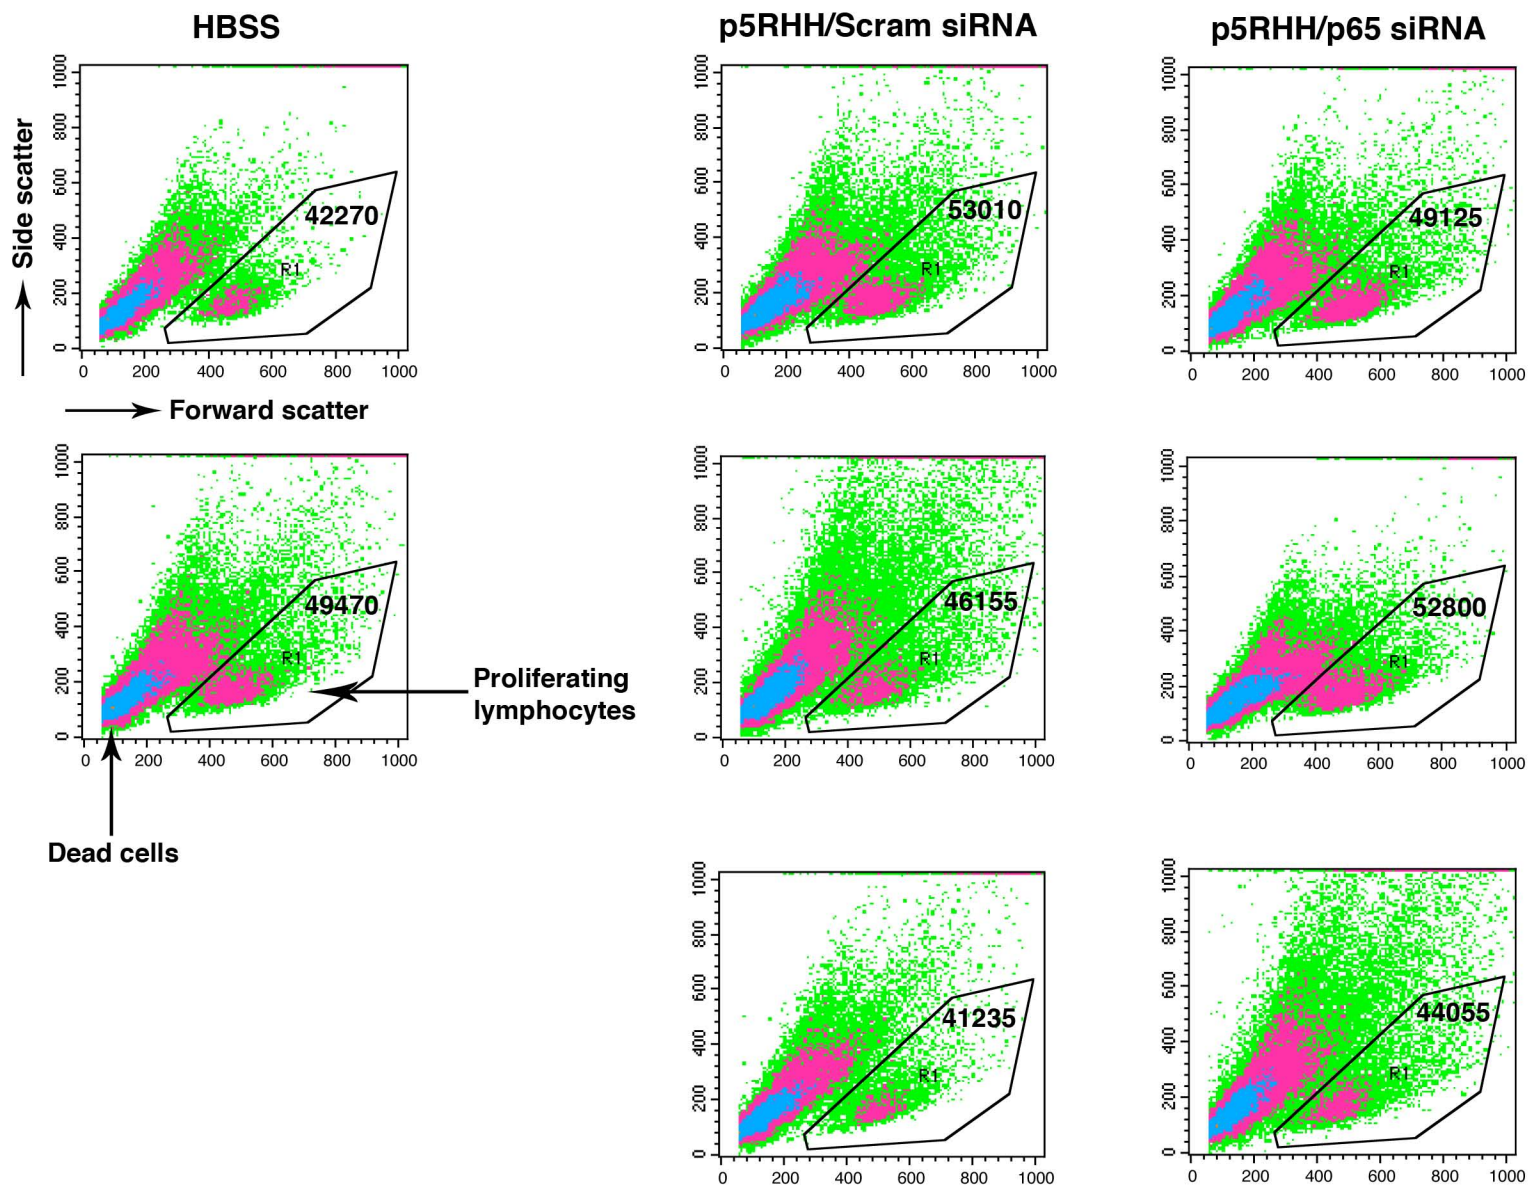

### Figure S7. Ex vivo CD4<sup>+</sup> T cell proliferation

On day 10 spleens were harvested and CD4<sup>+</sup> T cells were purified by positive magnetic bead sorting according to manufacturer's protocol (Myltenyi Biotec Inc.). T cells ( $2 \times 10^5$ ) were plated in triplicates in 96-well plates coated with anti-CD3 monoclonal antibody (5 ug/ml). After 72 h cells were harvested and enumerated by flow cytometry against time (45 sec). The number (events) of proliferating T cells in gated area is indicated.
